# Supplementary material for: Mineral and Organic Fertilizers Distinctly Affect Fungal Communities in the Crop Rhizosphere
Source: MDPI journal article supplement (doi:10.3390/jof8030251), 2022-03-01
Supplement: s1 [file s1]

## SUPPLEMENTARY FIGURES

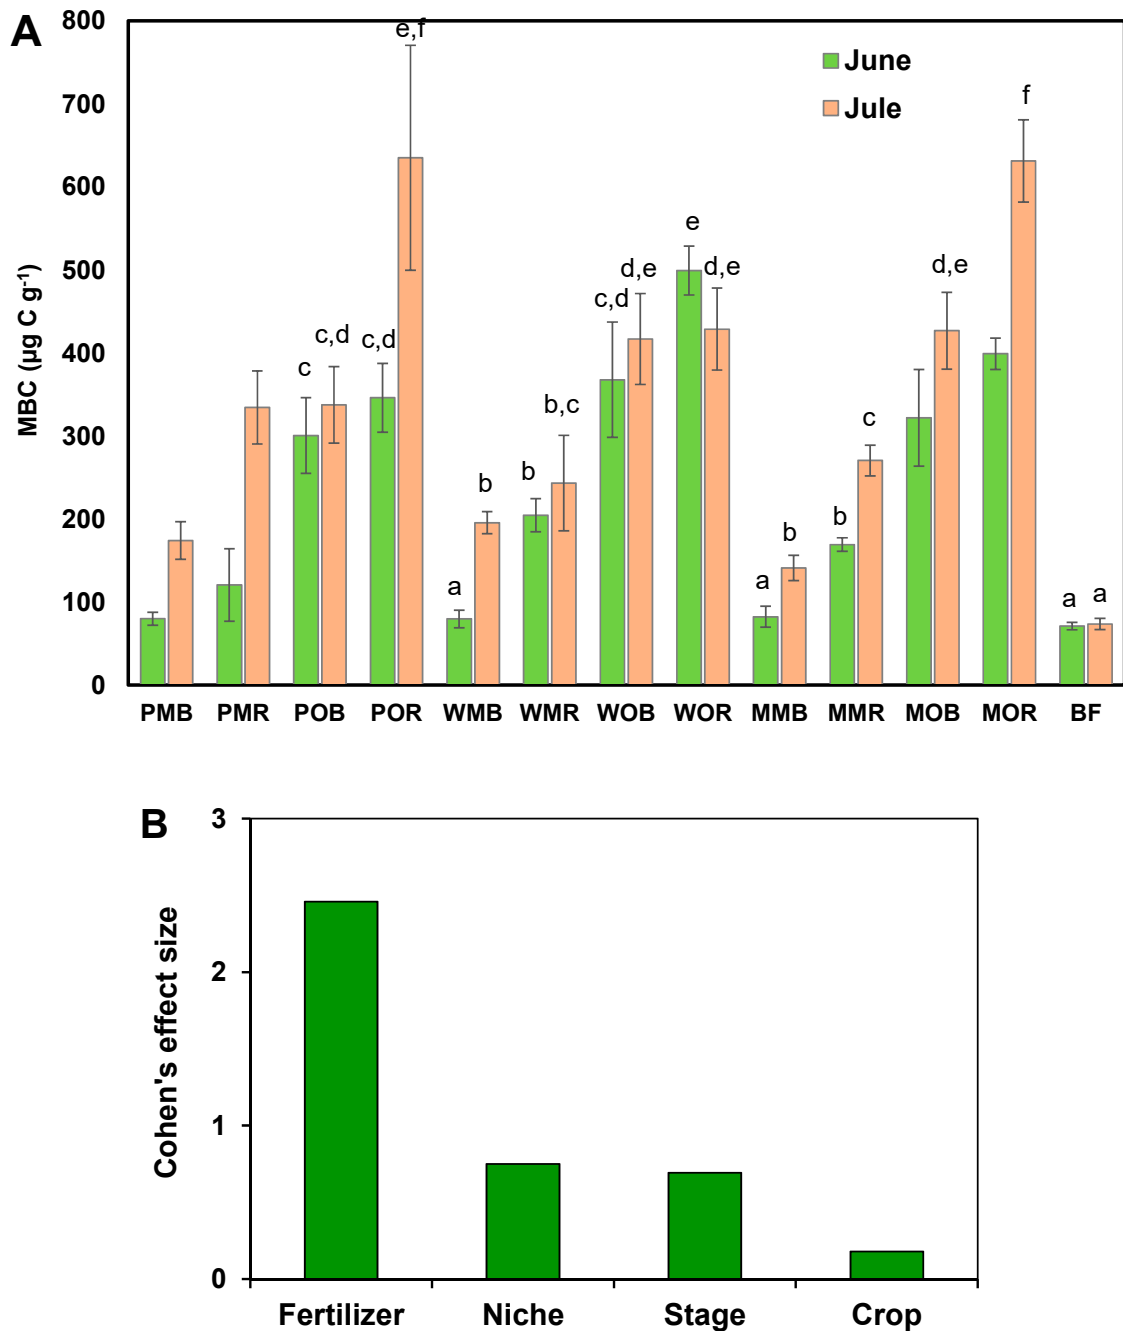

**Figure S1.** (A) Microbial biomass carbon (MBC) of the studied samples. All soil samples are indexed according to the scheme: «plant–fertilizer system–soil niche–sampling period». The following indices were used for (I) the crop species: P— potato, W — white mustard, M — maize; (II) fertilizer systems: M — mineral and O — organic; (III) soil niches: B— bulk soil, R— rhizosphere. The bare fallow without fertilizers is marked as BF. (B) The contribution of the ecological factors (niche, fertilizer system, crop type, stage of plant development) into MBC estimated using Cohen's  $d$  effect size.

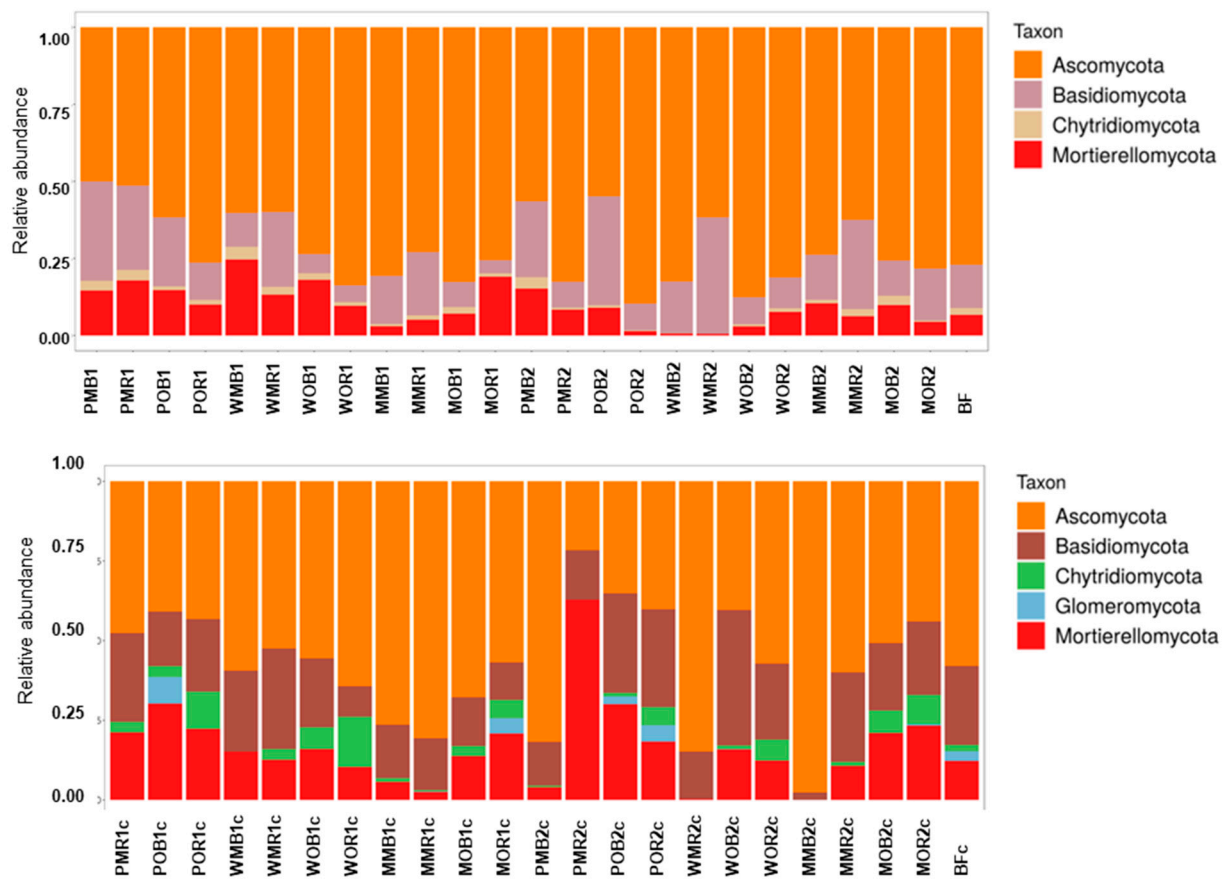

**Figure S2.** The structure of total (upper) and active (lower) fungal communities in studied samples at phylum level (the data are presented for taxa with abundance more than 0.5%). All soil samples are indexed according to the scheme: «plant–fertilizer system–soil niche–sampling period». The following indices were used for (I) the crop species: P— potato, W — white mustard, M — maize; (II) fertilizer systems: M — mineral and O — organic; (III) soil niches: B— bulk soil, R— rhizosphere; (IV) periods of sampling: 1 — June, 2 — July. The bare fallow without fertilizers is marked as BF.

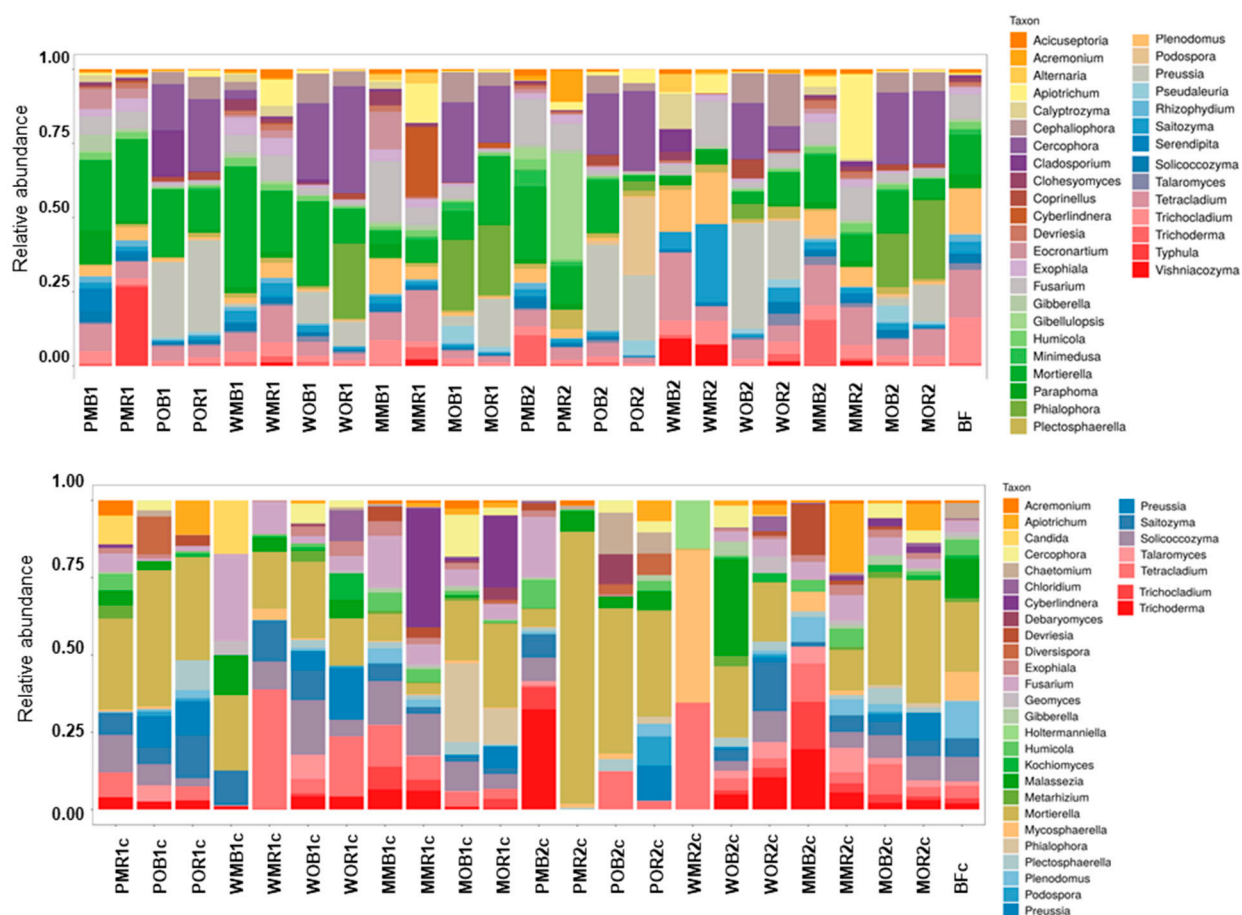

**Figure S3.** The structure of total (upper) and active (lower) fungal communities in studied samples at genera level (the data are presented for taxa with abundance more than 0.5%). All soil samples are indexed according to the scheme: «plant–fertilizer system–soil niche–sampling period». The following indices were used for (I) the crop species: P— potato, W — white mustard, M — maize; (II) fertilizer systems: M — mineral and O — organic; (III) soil niches: B— bulk soil, R— rhizosphere; (IV) periods of sampling: 1 — June, 2 — July. The bare fallow without fertilizers is marked as BF.

## SUPPLEMENTARY TABLES

**Table S1.** Basic chemical characteristics of the studied soil and rhizosphere samples collected in June and July of 2017 from a long-term fertilization experiment in Pushchino, Russia.

| Index | Plant         | Fertilizer system | Niche       | TOC, % | TN, % | C/N  | pH<br>H2O |
|-------|---------------|-------------------|-------------|--------|-------|------|-----------|
| June  |               |                   |             |        |       |      |           |
| PMB-1 | Potato        | Mineral           | Soil        | 1.23   | 0.13  | 9.4  | 4.51      |
| PMR-1 |               |                   | Rhizosphere | 1.34   | 0.13  | 10.0 | 4.53      |
| POB-1 |               | Organic           | Soil        | 1.68   | 0.15  | 11.0 | 5.92      |
| POR-1 |               |                   | Rhizosphere | 1.80   | 0.16  | 11.5 | 6.11      |
| WMB-1 | White mustard | Mineral           | Soil        | 1.23   | 0.13  | 9.4  | 4.33      |
| WMR-1 |               |                   | Rhizosphere | 1.36   | 0.14  | 9.7  | 4.82      |
| WOB-1 |               | Organic           | Soil        | 1.59   | 0.15  | 10.4 | 6.27      |
| WOR-1 |               |                   | Rhizosphere | 1.76   | 0.16  | 11.0 | 6.37      |
| MMB-1 | Maize         | Mineral           | Soil        | 1.22   | 0.13  | 9.0  | 4.44      |
| MMR-1 |               |                   | Rhizosphere | 1.35   | 0.14  | 9.5  | 4.56      |
| MOB-1 |               | Organic           | Soil        | 1.67   | 0.16  | 10.6 | 5.75      |
| MOR-1 |               |                   | Rhizosphere | 1.81   | 0.17  | 10.9 | 6.20      |
| July  |               |                   |             |        |       |      |           |
| PMB-2 | Potato        | Mineral           | Soil        | 1.22   | 0.12  | 10.0 | 4.39      |
| PMR-2 |               |                   | Rhizosphere | 1.35   | 0.13  | 10.3 | 4.41      |
| POB-2 |               | Organic           | Soil        | 1.64   | 0.16  | 10.4 | 6.16      |
| POR-2 |               |                   | Rhizosphere | 1.97   | 0.19  | 10.4 | 6.39      |
| WMB-2 | White mustard | Mineral           | Soil        | 1.22   | 0.13  | 9.3  | 4.75      |
| WMR-2 |               |                   | Rhizosphere | 1.28   | 0.13  | 9.6  | 4.76      |
| WOB-2 |               | Organic           | Soil        | 1.64   | 0.16  | 10.3 | 6.16      |
| WOR-2 |               |                   | Rhizosphere | 1.89   | 0.17  | 11.3 | 6.19      |
| MMB-2 | Maize         | Mineral           | Soil        | 1.21   | 0.12  | 9.8  | 4.40      |
| MMR-2 |               |                   | Rhizosphere | 1.33   | 0.13  | 10.2 | 4.58      |
| MOB-2 |               | Organic           | Soil        | 1.58   | 0.15  | 10.3 | 6.15      |
| MOR-2 |               |                   | Rhizosphere | 1.82   | 0.17  | 10.8 | 6.35      |
| BF    | Bare fallow   |                   | Soil        | 1.01   | 0.11  | 9.1  | 6.12      |

**Table S2.** The contribution of main and interaction effects among the ecological factors (niche, fertilizer system, crop type, stage of plant development) onto dispersion of MBC and fungal gene copies abundances using N-way ANOVA. Only statistically significant ( $p < 0.05$ ) factors were used.

| Treatment                               | F      | $\eta^2$ |
|-----------------------------------------|--------|----------|
| MBC                                     |        |          |
| Fertilizer                              | 302    | 0.61     |
| Niche                                   | 61.25  | 0.12     |
| Stage                                   | 53.01  | 0.11     |
| Crop $\times$ Niche $\times$ Stage      | 6.63   | 0.03     |
| Fungal abundance                        |        |          |
| Fertilizer                              | 918.71 | 0.57     |
| Niche                                   | 353.46 | 0.10     |
| Stage                                   | 162.53 | 0.22     |
| Fertilizer $\times$ Stage               | 20.31  | 0.01     |
| Fertilizer $\times$ Crop                | 19.39  | 0.02     |
| Fertilizer $\times$ Crop $\times$ Stage | 18.62  | 0.01     |
| Niche $\times$ Stage                    | 10.67  | 0.01     |
| Crop $\times$ Stage                     | 8.64   | 0.01     |
| Crop                                    | 6.24   | 0.01     |
| All 4 factors                           | 7.6    | 0.01     |

**Table S3.** The lack of overall response of the most abundant fungal phyla to fertilization (Organic vs. Mineral) in bulk soil and rhizosphere.

| Taxon               | t-test p-value | Mann-Whitney U-test p-value | Spearman r |
|---------------------|----------------|-----------------------------|------------|
| Bulk soil           |                |                             |            |
| Glomeromycota       | 0.3            | 0.5                         | 0.13       |
| Olpidiomycota       | 0.07           | 0.01                        | 0.51       |
| Basidiomycota       | 0.8            | 0.2                         | -0.25      |
| Mortierellomycota   | 0.7            | 0.6                         | 0.10       |
| Ascomycota          | 0.7            | 0.4                         | 0.16       |
| Monoblepharomycota  | 0.8            | 0.07                        | -0.36      |
| Chytridiomycota     | 0.9            | 0.9                         | 0.02       |
| Mucoromycota        | 0.2            | 0.2                         | 0.29       |
| Entomophthoromycota | 0.3            | 0.3                         | -0.20      |
| Rozellomycota       | 0.9            | 1.0                         | -0.01      |
| Zoopagomycota       | 0.3            | 0.3                         | -0.20      |
| Kickxellomycota     | 0.4            | 0.8                         | -0.05      |
| Rhizosphere         |                |                             |            |
| Basidiomycota       | 0.002          | 0.003                       | -0.59      |
| Ascomycota          | 0.007          | 0.007                       | 0.54       |
| Chytridiomycota     | 0.10           | 0.2                         | -0.30      |
| Olpidiomycota       | 0.07           | 0.002                       | 0.64       |
| Monoblepharomycota  | 0.05           | 0.001                       | -0.68      |
| Mortierellomycota   | 0.8            | 0.5                         | -0.16      |
| Mucoromycota        | 0.08           | 0.04                        | -0.43      |
| Rozellomycota       | 0.9            | 0.3                         | -0.22      |
| Aphelidiomycota     | 0.3            | 0.4                         | 0.20       |
| Entomophthoromycota | 0.3            | 0.3                         | -0.21      |
| Zoopagomycota       | 0.3            | 0.3                         | -0.21      |
| Kickxellomycota     | 0.3            | 0.8                         | -0.05      |
| Glomeromycota       | 1.0            | 0.8                         | 0.05       |

**Table S4.** The top 70 fungal genera responsive to fertilization (Organic vs. Mineral) in bulk soil and rhizosphere (potentially plant pathogenic genera in **bold**).

| Taxon                         | t-test p-value | Mann-Whitney<br>U-test p-value | Spearman r |
|-------------------------------|----------------|--------------------------------|------------|
| Bulk soil                     |                |                                |            |
| <i>Cercophora</i>             | 0.0003         | 0.0001                         | 0.76       |
| <i>Preussia</i>               | 0.006          | 0.0001                         | 0.76       |
| <i>Cephaliophora</i>          | 0.0005         | 0.0003                         | 0.71       |
| <i>Inocybe</i>                | 0.0007         | 0.0001                         | 0.77       |
| <b><i>Plenodomus</i></b>      | 0.001          | <0.0001                        | -0.73      |
| <b><i>Devriesia</i></b>       | 0.0003         | 0.0001                         | -0.75      |
| <i>Ascobolus</i>              | 0.0010         | 0.002                          | 0.62       |
| <i>Calypstrozyma</i>          | 0.03           | 0.002                          | -0.61      |
| <i>Clohesyomyces</i>          | 0.01           | 0.001                          | -0.64      |
| <b><i>Fusarium</i></b>        | 0.006          | 0.0004                         | -0.66      |
| <i>Thermomyces</i>            | 0.0003         | 0.0005                         | 0.69       |
| <b><i>Paraphoma</i></b>       | 0.03           | 0.0003                         | -0.72      |
| <i>Furcaspora</i>             | 0.02           | <0.0001                        | -0.77      |
| <i>Trichocladium</i>          | 0.007          | 0.0008                         | -0.63      |
| <b><i>Ophiosphaerella</i></b> | 0.010          | 0.001                          | -0.64      |
| <i>Phialophora</i>            | 0.04           | 0.010                          | 0.51       |
| <i>Exophiala</i>              | 0.009          | 0.003                          | -0.57      |
| <i>Conlarium</i>              | 0.005          | 0.0008                         | -0.66      |
| <b><i>Drechslera</i></b>      | 0.01           | 0.0006                         | -0.68      |
| <i>Geomyces</i>               | 0.0005         | 0.0003                         | -0.72      |
| <b><i>Setophoma</i></b>       | 0.005          | 0.0003                         | -0.72      |
| <i>Pseudaleuria</i>           | 0.05           | 0.005                          | 0.56       |
| <i>Meliniomyces</i>           | 0.03           | 0.002                          | -0.61      |
| <i>Neobulgaria</i>            | 0.005          | 0.003                          | -0.58      |
| <i>Serendipita</i>            | 0.06           | <0.0001                        | -0.89      |
| <i>Rhizophlyctis</i>          | 0.03           | 0.004                          | 0.58       |
| <i>Metacordyceps</i>          | 0.0006         | 0.005                          | -0.55      |
| <b><i>Ganoderma</i></b>       | 0.007          | 0.007                          | -0.53      |
| <i>Lectera</i>                | 0.001          | 0.0004                         | -0.70      |
| <i>Oidiodendron</i>           | 0.03           | 0.004                          | -0.56      |
| <i>Scedosporium</i>           | 0.008          | 0.001                          | 0.63       |
| <i>Spiromastix</i>            | 0.01           | 0.01                           | -0.50      |
| <i>Tetracladium</i>           | 0.05           | 0.003                          | -0.56      |
| <i>Mycothermus</i>            | 0.003          | 0.0003                         | 0.71       |
| <i>Pseudosigmoidea</i>        | 0.01           | 0.05                           | -0.39      |
| <i>Conocybe</i>               | 0.08           | 0.04                           | 0.40       |
| <b><i>Eocronartium</i></b>    | 0.1            | 0.005                          | -0.56      |
| <i>Cladorrhinum</i>           | 0.06           | 0.05                           | 0.40       |
| <b><i>Clavispora</i></b>      | 0.1            | 0.006                          | -0.55      |
| <b><i>Coniochaeta</i></b>     | 0.08           | 0.004                          | 0.57       |
| <i>Paraphaeosphaeria</i>      | 0.09           | 0.07                           | -0.36      |
| <i>Cladophialophora</i>       | 0.007          | 0.0003                         | -0.71      |

|                               |         |         |       |
|-------------------------------|---------|---------|-------|
| <i>Echinoderma</i>            | 0.02    | 0.0009  | -0.66 |
| <i>Schwanniomyces</i>         | 0.02    | 0.002   | -0.61 |
| <b><i>Scytalidium</i></b>     | 0.02    | 0.02    | 0.45  |
| <i>Lycoperdon</i>             | 0.008   | 0.01    | -0.49 |
| <i>Arthrobotrys nematodes</i> | 0.02    | 0.002   | -0.60 |
| <i>Trematosphaeria</i>        | 0.07    | 0.2     | -0.26 |
| <i>Vishniacozyma</i>          | 0.1     | 0.0010  | -0.65 |
| <b><i>Penicillium</i></b>     | 0.02    | 0.01    | -0.49 |
| <b><i>Truncatella</i></b>     | 0.02    | 0.01    | 0.49  |
| <i>Trichoderma</i>            | 0.1     | 0.3     | -0.23 |
| <i>Coprinus</i>               | 0.04    | 0.002   | 0.60  |
| <b><i>Gibellulopsis</i></b>   | 0.1     | 0.03    | -0.43 |
| <i>Athelopsis</i>             | 0.2     | 0.02    | -0.45 |
| <i>Coprinellus</i>            | 0.06    | 1.0     | 0.01  |
| <i>Monodictys</i>             | 0.1     | 0.09    | 0.34  |
| <i>Saitozyma</i>              | 0.1     | 0.02    | -0.47 |
| <b><i>Acicuseptoria</i></b>   | 0.1     | 0.02    | -0.45 |
| <i>Simocybe</i>               | 0.04    | 0.002   | 0.61  |
| <b><i>Gibberella</i></b>      | 0.1     | 0.03    | -0.42 |
| <i>Chloridium</i>             | 0.08    | 0.04    | 0.40  |
| <i>Humicola</i>               | 0.1     | 0.09    | -0.33 |
| <i>Microascus</i>             | 0.02    | 0.01    | 0.51  |
| <i>Diversispora</i>           | 0.3     | 0.09    | 0.34  |
| <b><i>Cladosporium</i></b>    | 0.6     | 0.01    | -0.50 |
| <b><i>Corticium</i></b>       | 0.05    | 0.01    | 0.51  |
| <b><i>Botrytis</i></b>        | 0.2     | 0.04    | -0.41 |
| <i>Acaulium</i>               | 0.05    | 0.02    | 0.46  |
| <b><i>Microdochium</i></b>    | 0.3     | 0.002   | -0.61 |
| Rhizosphere                   |         |         |       |
| <i>Cercophora</i>             | <0.0001 | <0.0001 | 0.88  |
| <i>Preussia</i>               | 0.0004  | <0.0001 | 0.81  |
| <i>Cephaliophora</i>          | 0.007   | <0.0001 | 0.81  |
| <i>Exophiala</i>              | <0.0001 | <0.0001 | -0.87 |
| <i>Phialophora</i>            | 0.02    | 0.0009  | 0.68  |
| <i>Plenodomus</i>             | 0.001   | <0.0001 | -0.87 |
| <b><i>Fusarium</i></b>        | <0.0001 | <0.0001 | -0.85 |
| <i>Ascobolus</i>              | 0.0007  | <0.0001 | 0.84  |
| <i>Thermomyces</i>            | <0.0001 | <0.0001 | 0.92  |
| <i>Serendipita</i>            | 0.002   | <0.0001 | -0.82 |
| <i>Devriesia</i>              | 0.002   | 0.0007  | -0.69 |
| <i>Pseudaleuria</i>           | 0.03    | 0.002   | 0.64  |
| <b><i>Gibberella</i></b>      | 0.0009  | <0.0001 | -0.74 |
| <i>Inocybe</i>                | 0.008   | <0.0001 | 0.84  |
| <i>Acicuseptoria</i>          | 0.005   | 0.0010  | -0.68 |
| <i>Calypetrozyma</i>          | 0.02    | 0.005   | -0.58 |
| <i>Paraphoma</i>              | 0.006   | 0.002   | -0.64 |
| <b><i>Eocronartium</i></b>    | 0.02    | 0.009   | -0.54 |
| <b><i>Ophiosphaerella</i></b> | 0.009   | 0.0006  | -0.71 |



|                              |       |         |       |
|------------------------------|-------|---------|-------|
| <i>Apiotrichum</i>           | 0.03  | 0.05    | -0.41 |
| <b><i>Venturia</i></b>       | 0.002 | 0.0003  | -0.75 |
| <b><i>Mycosphaerella</i></b> | 0.007 | 0.006   | -0.56 |
| <b><i>Microdochium</i></b>   | 0.002 | 0.0003  | -0.74 |
| <i>Clohesyomyces</i>         | 0.01  | 0.01    | -0.52 |
| <i>Athelopsis</i>            | 0.03  | <0.0001 | -0.81 |
| <i>Cladorrhinum</i>          | 0.02  | 0.02    | 0.48  |
| <i>Conlarium</i>             | 0.010 | <0.0001 | -0.86 |
| <b><i>Drechslera</i></b>     | 0.008 | 0.0006  | -0.71 |
| <b><i>Rhizophydium</i></b>   | 0.02  | 0.06    | -0.38 |
| <i>Meliniomyces</i>          | 0.06  | 0.0005  | -0.71 |
| <i>Metacordyceps</i>         | 0.003 | 0.002   | -0.62 |
| <b><i>Pyrenochaeta</i></b>   | 0.04  | 0.2     | -0.29 |
| <i>Furcaspora</i>            | 0.07  | <0.0001 | -0.87 |
| <i>Operculomyces</i>         | 0.02  | 0.0007  | 0.70  |
| <b><i>Boeremia</i></b>       | 0.04  | 0.02    | -0.46 |
| <i>Humicola</i>              | 0.06  | 0.03    | -0.44 |
| <i>Tetracladium</i>          | 0.06  | 0.03    | -0.43 |
| <i>Holtermanniella</i>       | 0.07  | 0.01    | -0.53 |
| <i>Scedosporium</i>          | 0.008 | 0.0007  | 0.70  |
| <b><i>Clavispora</i></b>     | 0.07  | 0.0007  | -0.70 |
| <i>Rhizophlyctis</i>         | 0.04  | 0.03    | 0.45  |
| <i>Cryptococcus</i>          | 0.009 | 0.005   | -0.58 |
| <i>Conocybe</i>              | 0.06  | 0.1     | 0.32  |
| <b><i>Botrytis</i></b>       | 0.10  | 0.0003  | -0.74 |
| <i>Lectera</i>               | 0.09  | 0.0001  | -0.78 |
| <i>Vishniacozyma</i>         | 0.09  | 0.008   | -0.55 |
| <b><i>Setophoma</i></b>      | 0.1   | <0.0001 | -0.81 |
| <b><i>Acremonium</i></b>     | 0.1   | 0.0002  | -0.76 |
| <i>Bullera</i>               | 0.06  | 0.008   | -0.55 |
| <b><i>Gibellulopsis</i></b>  | 0.2   | 0.03    | -0.44 |
| <i>Mycothermus</i>           | 0.02  | 0.004   | 0.59  |
| <i>Podospora</i>             | 0.2   | 0.0004  | 0.72  |
| <i>Cotylidia</i>             | 0.08  | 0.0002  | -0.76 |
| <i>Cladophialophora</i>      | 0.01  | 0.0005  | -0.71 |
| <b><i>Typhula</i></b>        | 0.2   | 0.1     | -0.31 |
| <b><i>Cladosporium</i></b>   | 0.1   | 0.001   | -0.67 |
| <i>Clonostachys</i>          | 0.1   | 0.09    | -0.35 |
| <i>Coprinus</i>              | 0.03  | 0.0007  | 0.70  |
| <i>Acaulium</i>              | 0.01  | 0.004   | 0.59  |
| <b><i>Olpidium</i></b>       | 0.07  | 0.002   | 0.64  |
| <i>Dendryphion</i>           | 0.02  | 0.005   | -0.58 |
| <i>Simocybe</i>              | 0.02  | 0.010   | 0.53  |
| <b><i>Ganoderma</i></b>      | 0.06  | 0.09    | -0.35 |
| <i>Udeniozyma</i>            | 0.07  | 0.10    | -0.34 |
| <i>Kotlabaea</i>             | 0.05  | 0.05    | -0.40 |
| <i>Fusicolla</i>             | 0.2   | 0.03    | -0.44 |
| <b><i>Truncatella</i></b>    | 0.03  | 0.03    | 0.45  |

|                       |      |       |       |
|-----------------------|------|-------|-------|
| <i>Leucosporidium</i> | 0.06 | 0.05  | -0.41 |
| <i>Ustilentyloma</i>  | 0.01 | 0.005 | -0.58 |
| <i>Kochiomyces</i>    | 0.2  | 0.05  | -0.41 |

**Table S5.** Fungal taxa associated with rhizosphere of potato, white mustard and maize. Genera with a share of >0.1%, which relative abundance increased by at least 10 times for each of the samples as a result of any of the treatments.

| <b>Potato</b>           | <b>Mustard</b>        | <b>Maize</b>               | <b>Potato<br/>&amp; Mustard</b> | <b>Potato<br/>&amp; Maize</b> | <b>Maize<br/>&amp; Mustard</b> |
|-------------------------|-----------------------|----------------------------|---------------------------------|-------------------------------|--------------------------------|
| <i>Clonostachys</i>     | <i>Ceratobasidium</i> | <i>Candida</i>             | <i>Acremonium</i>               | <i>Acaulium</i>               | <i>Athelopsis</i>              |
| <i>Colletotrichum</i>   | <i>Clitopilus</i>     | <i>Conocybe</i>            | <i>Coprinopsis</i>              | <i>Acidomelania</i>           | <i>Bullera</i>                 |
| <i>Cotylidia</i>        | <i>Filobasidium</i>   | <i>Cutaneotrichosporon</i> | <i>Operculomyces</i>            | <i>Arthrobotrys</i>           | <i>Crocicreas</i>              |
| <i>Gibellulopsis</i>    | <i>Fomitopsis</i>     | <i>Cyberlindnera</i>       |                                 | <i>Chaetomidium</i>           | <i>Holtermanniella</i>         |
| <i>Heterogastridium</i> | <i>Glarea</i>         | <i>Mycena</i>              |                                 | <i>Clavispora</i>             | <i>Kernia</i>                  |
| <i>Hymenoscyphus</i>    | <i>Micarea</i>        | <i>Scutellinia</i>         |                                 | <i>Coniochaeta</i>            | <i>Monodictys</i>              |
| <i>Incertomyces</i>     | <i>Occultifur</i>     | <i>Vermispora</i>          |                                 | <i>Fusicolla</i>              | <i>Phialophora</i>             |
| <i>Pilidium</i>         | <i>Panaeolus</i>      |                            |                                 | <i>Lectera</i>                | <i>Rhynchogastrema</i>         |
| <i>Podospora</i>        | <i>Trechispora</i>    |                            |                                 | <i>Mycothermus</i>            | <i>Vishniacozyma</i>           |

**Table S6.** Fungal taxa associated with organic or mineral fertilizers. Genera with a share of >0.1%, which relative abundance increased by at least 10 times for each of the samples after fertilization by manure or mineral fertilizer.

| Activation<br>by NPK       | Activation<br>by manure | Activation<br>by NPK<br>& manure | Suppression<br>by NPK                         | Suppression<br>by manure |
|----------------------------|-------------------------|----------------------------------|-----------------------------------------------|--------------------------|
| <i>Acremonium</i>          | <i>Ascobolus</i>        | <i>Acidomelania</i>              | <i>Agrocybe</i><br><i>Caryophylloseptoria</i> | <i>Cladophialophora</i>  |
| <i>Athelopsis</i>          | <i>Cephalophora</i>     | <i>Apiotrichum</i>               | <i>a</i>                                      | <i>Cladosporium</i>      |
| <i>Botrytis</i>            | <i>Cercophora</i>       | <i>Arthrobotrys</i>              | <i>Coprinus</i>                               | <i>Clitopilus</i>        |
| <i>Bullera</i>             | <i>Cladorrhinum</i>     | <i>Boeremia</i>                  | <i>Cortinarius</i>                            | <i>Conlarium</i>         |
| <i>Calypotrozyma</i>       | <i>Coniochaeta</i>      | <i>Chaetomidium</i>              | <i>Gamsia</i>                                 | <i>Emericellopsis</i>    |
| <i>Candida</i>             | <i>Conocybe</i>         | <i>Cheilymenia</i>               | <i>Pluteus</i>                                | <i>Eocronartium</i>      |
| <i>Ceratobasidium</i>      | <i>Coprinopsis</i>      | <i>Clonostachys</i>              | <i>Trichophyton</i>                           | <i>Furcasporea</i>       |
|                            | <i>Heterogastridium</i> |                                  |                                               |                          |
| <i>Clavisporea</i>         | <i>m</i>                | <i>Colletotrichum</i>            |                                               | <i>Gregorella</i>        |
| <i>Cotylidia</i>           | <i>Inocybe</i>          | <i>Coprinellus</i>               |                                               | <i>Gymnoascus</i>        |
| <i>Cryptococcus</i>        | <i>Monodictys</i>       | <i>Cyberlindnera</i>             |                                               | <i>Gymnopilus</i>        |
| <i>Cutaneotrichosporon</i> |                         |                                  |                                               |                          |
|                            | <i>Mycothermus</i>      | <i>Dendryphion</i>               |                                               | <i>Helicodendron</i>     |
| <i>Filobasidium</i>        | <i>Olpidium</i>         | <i>Dioszegia</i>                 |                                               | <i>Knufia</i>            |
| <i>Fomitopsis</i>          | <i>Operculomyces</i>    | <i>Itersonilia</i>               |                                               | <i>Kochiomyces</i>       |
| <i>Fusicolla</i>           | <i>Panaeolus</i>        | <i>Mycosphaerella</i>            |                                               | <i>Kotlabaea</i>         |
| <i>Gibellulopsis</i>       | <i>Phialophora</i>      | <i>Plectosphaerella</i>          |                                               | <i>Leptospora</i>        |
|                            |                         | <i>Pleurophragmium</i>           |                                               |                          |
| <i>Glarea</i>              | <i>Pilidium</i>         | <i>m</i>                         |                                               | <i>Meliniomyces</i>      |
| <i>Holtermanniella</i>     | <i>Podospora</i>        | <i>Psathyrella</i>               |                                               | <i>Microdochium</i>      |
| <i>Incertomyces</i>        | <i>Preussia</i>         | <i>Pyrenochaetopsis</i>          |                                               | <i>Neobulgaria</i>       |
| <i>Lectera</i>             | <i>Pseudaleuria</i>     | <i>Rhizophlyctis</i>             |                                               | <i>Nigrospora</i>        |
| <i>Micarea</i>             | <i>Scedosporium</i>     | <i>Scutellinia</i>               |                                               | <i>Oidiodendron</i>      |
| <i>Mycena</i>              | <i>Thermomyces</i>      | <i>Vishniacozyma</i>             |                                               | <i>Ophiosphaerella</i>   |
| <i>Rhynchogastrea</i>      | <i>Trechispora</i>      |                                  |                                               | <i>Periconia</i>         |
| <i>Rhynchosporium</i>      |                         |                                  |                                               | <i>Plenodomus</i>        |
| <i>Setophoma</i>           |                         |                                  |                                               | <i>Pyrenochaeta</i>      |
| <i>Tricholoma</i>          |                         |                                  |                                               | <i>Sagenomella</i>       |
| <i>Typhula</i>             |                         |                                  |                                               | <i>Sakaguchia</i>        |
| <i>Vermispora</i>          |                         |                                  |                                               | <i>Serendipita</i>       |
|                            |                         |                                  |                                               | <i>Spirosphaera</i>      |
|                            |                         |                                  |                                               | <i>Urnula</i>            |
|                            |                         |                                  |                                               | <i>Venturia</i>          |

**Table S7.** PERMANOVA and ANOSIM tests of variance and similarities of total fungal communities' using Bray-Curtis (BC) distance matrix.

| Treatment                                                    | Groups | PERMANOVA |         | ANOSIM |         |
|--------------------------------------------------------------|--------|-----------|---------|--------|---------|
|                                                              |        | Pseudo-F  | p-value | R      | p-value |
| Bulk soil and rhizosphere; Total fungal communities (N = 52) |        |           |         |        |         |
| Fertilizer                                                   | 3      | 12.98     | 0.001   | 0.877  | 0.001   |
| Plant                                                        | 4      | 1.72      | 0.026   | 0.053  | 0.084   |
| Niche                                                        | 4      | 1.05      | 0.357   | 0.033  | 0.14    |
| Stage                                                        | 2      | 0.983     | 0.40    | -0.032 | 0.928   |
| Fertilizer × Plant                                           | 7      | 6.63      | 0.001   | 0.678  | 0.001   |
| Fertilizer × Niche                                           | 5      | 7.29      | 0.001   | 0.634  | 0.001   |
| Fertilizer × Stage                                           | 5      | 7.11      | 0.001   | 0.609  | 0.001   |
| Plant × Niche                                                | 7      | 1.344     | 0.064   | 0.039  | 0.168   |
| Plant × Stage                                                | 7      | 1.292     | 0.109   | 0.018  | 0.313   |
| Niche × Stage                                                | 4      | 1.013     | 0.398   | 0.609  | 0.232   |
| Only rhizosphere; Total fungal communities (N = 25)          |        |           |         |        |         |
| Fertilizer                                                   | 2      | 13.52     | 0.001   | 0.953  | 0.001   |
| Plant                                                        | 3      | 1.31      | 0.179   | 0.036  | 0.227   |
| Stage                                                        | 2      | 1.16      | 0.273   | -0.022 | 0.559   |
| Fertilizer × Plant                                           | 6      | 4.93      | 0.001   | 0.707  | 0.001   |
| Fertilizer × Stage                                           | 4      | 5.82      | 0.001   | 0.646  | 0.001   |
| Plant × Stage                                                | 6      | 1.11      | 0.313   | 0.002  | 0.446   |
